# Supplementary material
Source: PubMed Central journal article supplement (PMC2886657)
Supplement: 00783.2009_1.pdf [file 00783.2009_1.pdf]

1

**Data Supplement**2 **Sinoatrial node cell is a dynamic SYSTEM of sarcolemmal and intracellular proteins...**

3

4 Victor A. Maltsev and Edward G. Lakatta

5 Parameters and formulations of our numerical model of rabbit SANC, 4 supplemental tables, and  
6 2 supplemental figures

7

8 **MATHEMATICAL DESCRIPTION OF THE MODEL**

9

10 The present model of rabbit SANC is a system of 30 first-order differential equations. All model  
11 equations and parameter values are provided below. Online Table 1 summarizes all model  
12 variables ( $y_1$ - $y_{30}$ ) with their initial values. The model is based on our previously published  
13 version of a “Basal State” model (7) that was modified in the present study to simulate GPCR  
14 modulation of rabbit SANC automaticity.

15

16 **PARAMETERS**

17

18 **Fixed ion concentrations, mM**19  $Ca_o = 2$ : Extracellular  $Ca^{2+}$  concentration.20  $K_o = 5.4$ : Extracellular  $K^+$  concentration.21  $K_i = 140$ : Intracellular  $K^+$  concentration.22  $Na_o = 140$ : Extracellular  $Na^+$  concentration.23  $Na_i = 10$ : Intracellular  $Na^+$  concentration.24  $Mg_i = 2.5$ : Intracellular  $Mg^{2+}$  concentration.

25

26 **Cell compartments**27  $C_m = 32$  pF: Cell electric capacitance.28  $L_{cell} = 70$   $\mu$ m: Cell length.29  $R_{cell} = 4$   $\mu$ m: Cell radius.30  $L_{sub} = 0.02$   $\mu$ m: Distance between jSR and surface membrane (submembrane space).31  $V_{cell} = \pi \cdot R_{cell}^2 \cdot L_{cell} = 3.5185838$  pL: Cell volume.32  $V_{sub} = 2\pi \cdot L_{sub} \cdot (R_{cell} - L_{sub}/2) \cdot L_{cell} = 0.035097874$  pL: Submembrane space volume.33  $V_{jSR\_part} = 0.0012$ : Part of cell volume occupied by junctional SR.34  $V_{jSR} = V_{jSR\_part} \cdot V_{cell}$ : Volume of junctional SR ( $Ca^{2+}$  release store).35  $V_{i\_part} = 0.46$ : Part of cell volume occupied with myoplasm.36  $V_i = V_{i\_part} \cdot V_{cell} - V_{sub}$ : Myoplasmic volume.37  $V_{nSR\_part} = 0.0116$ : Part of cell volume occupied by network SR.38  $V_{nSR} = V_{nSR\_part} \cdot V_{cell}$ : Volume of network SR ( $Ca^{2+}$  uptake store).

39

40 **The Nernst equation and electric potentials, mV**41  $E_X = (RT/F) \cdot \ln([X]_o/[X]_i) = E_T \cdot \ln([X]_o/[X]_i)$ , where42  $F = 96485$  C/M is Faraday constant,43  $T = 310.15$  K° is absolute temperature for 37°C,44  $R = 8.3144$  J/(M·K°) is the universal gas constant,

45  $E_T$  is “RT/F” factor = 26.72655 mV,  
 46 and  $[X]_o$  and  $[X]_i$  are concentrations of an ion “X” out and inside cell, respectively.  
 47  $E_{Na} = E_T \cdot \ln(Na_o/Na_i)$ : Equilibrium potential for  $Na^+$ .  
 48  $E_K = E_T \cdot \ln(K_o/K_i)$ : Equilibrium potential for  $K^+$ .  
 49  $E_{Ks} = E_T \cdot \ln[(K_o + 0.12 \cdot Na_o)/(K_i + 0.12 \cdot Na_i)]$ : Reversal potential of  $I_{Ks}$ .  
 50  $E_{CaL} = 45$ : Apparent reversal potential of  $I_{CaL}$ .  
 51  $E_{CaT} = 45$ : Apparent reversal potential of  $I_{CaT}$ .  
 52  $E_{st} = 37.4$ : Apparent reversal potential of  $I_{st}$ .

53

### 54 Sarcolemmal ion current types and their parameter values

55

56  $I_{CaL}$ : L-type  $Ca^{2+}$  current [ $g_{CaL,max,basal} = 0.58$  nS/pF, as in Kurata et al. model (4)].  
 57 Steady-state activation parameters:  $V_{1/2,d} = -13.5$  mV;  $K_d = 6$  mV.  
 58 Steady-state inactivation parameters:  $V_{1/2,f} = -35$  mV;  $K_f = 7.3$  mV.  
 59  $K_{mfCa} = 0.00035$  mM: Dissociation constant of  $Ca^{2+}$ -dependent  $I_{CaL}$  inactivation.  
 60  $\beta_{fCa} = 60$  mM $^{-1} \cdot$  ms $^{-1}$ :  $Ca^{2+}$  association rate constant for  $I_{CaL}$ .  
 61  $\alpha_{fCa} = 0.021$  ms $^{-1}$ :  $Ca^{2+}$  dissociation rate constant for  $I_{CaL}$ .  
 62  $b_{CaL,max} = 0.31$ : maximum ACh-induced inhibition of  $I_{CaL}$ .

63

64  $I_{CaT}$ : T-type  $Ca^{2+}$  current ( $g_{CaT,max} = 0.1832$  nS/pF).

65

66  $I_f$ : Hyperpolarization-activated current ( $g_{If,max} = 0.15$  nS/pF).  
 67  $V_{If,1/2,basal} = -64$  mV: half activation voltage for  $I_f$  current in the basal state.  
 68  $s_{max} = -7.2$  mV: maximum ACh-induced shift of  $I_f$  half activation voltage.  
 69  $n_f = 0.69$  and  $K_{0.5,f} = 12.6$  nM: Michaelis-Menton parameters for ACh modulation of  $I_f$ .

70

71  $I_{st}$ : Sustained non-selective current ( $g_{st,max} = 0.003$  nS/pF).

72

73  $I_{Kr}$ : Delayed rectifier  $K^+$  current rapid component ( $g_{Kr,max} = 0.08113973$  nS/pF).

74

75  $I_{Ks}$ : Delayed rectifier  $K^+$  current slow component ( $g_{Ks,max} = 0.0259$  nS/pF).

76

77  $I_{to}$ : 4-aminopyridine sensitive transient  $K^+$  current ( $g_{to,max} = 0.252$  nS/pF).

78

79  $I_{sus}$ : 4-aminopyridine sensitive sustained  $K^+$  current ( $g_{sus,max} = 0.02$  nS/pF).

80

81  $I_{NaK}$ :  $Na^+/K^+$  pump current ( $I_{NaK,max} = 2.88$  pA/pF).

82  $K_{mKp} = 1.4$  mM: Half-maximal  $K_o$  for  $I_{NaK}$ .

83  $K_{mNap} = 14$  mM: Half-maximal  $Na_i$  for  $I_{NaK}$ .

84

85  $I_{bCa}$ : Background  $Ca^{2+}$  current ( $g_{bCa} = 0.0006$  nS/pF).

86

87  $I_{bNa}$ : Background  $Na^+$  current ( $g_{bNa} = 0.00486$  nS/pF).

88

89  $I_{KACh}$ : Acetylcholine-activated  $K^+$  current;  $I_{KACh} = 0$ , when  $[ACh] = 0$ .

90  $g_{KACh,max} = 0.14241818$  nS/pF.

91  
 92  $I_{\text{NCX}}$ :  $\text{Na}^+/\text{Ca}^{2+}$  exchanger (NCX) current ( $k_{\text{NCX}} = 187.5$  pA/pF).  
 93  $K_{1\text{ni}} = 395.3$ : intracellular  $\text{Na}^+$  binding to first site on NCX.  
 94  $K_{2\text{ni}} = 2.289$ : intracellular  $\text{Na}^+$  binding to second site on NCX.  
 95  $K_{3\text{ni}} = 26.44$ : intracellular  $\text{Na}^+$  binding to third site on NCX.  
 96  $K_{1\text{no}} = 1628$ : extracellular  $\text{Na}^+$  binding to first site on NCX.  
 97  $K_{2\text{no}} = 561.4$ : extracellular  $\text{Na}^+$  binding to second site on NCX.  
 98  $K_{3\text{no}} = 4.663$ : extracellular  $\text{Na}^+$  binding to third site on NCX.  
 99  $K_{\text{ci}} = 0.0207$ : intracellular  $\text{Ca}^{2+}$  binding to NCX transporter.  
 100  $K_{\text{co}} = 3.663$ : extracellular  $\text{Ca}^{2+}$  binding to NCX transporter.  
 101  $K_{\text{cni}} = 26.44$ : intracellular  $\text{Na}^+$  and  $\text{Ca}^{2+}$  simultaneous binding to NCX.  
 102  $Q_{\text{ci}} = 0.1369$ : intracellular  $\text{Ca}^{2+}$  occlusion reaction of NCX.  
 103  $Q_{\text{co}} = 0$ : extracellular  $\text{Ca}^{2+}$  occlusion reaction of NCX.  
 104  $Q_{\text{n}} = 0.4315$ :  $\text{Na}^+$  occlusion reactions of NCX.

105

**Ca<sup>2+</sup> diffusion**

107  $\tau_{\text{diffCa}} = 0.04$  ms: Time constant of  $\text{Ca}^{2+}$  diffusion from the submembrane to myoplasm.

108  $\tau_{\text{r}} = 40$  ms: Time constant for  $\text{Ca}^{2+}$  transfer from the network to junctional SR.

109

**SR Ca<sup>2+</sup> ATPase function**

111  $K_{\text{up}} = 0.6 \cdot 10^{-3}$  mM: Half-maximal  $\text{Ca}_i$  for  $\text{Ca}^{2+}$  uptake in the network SR.

112  $P_{\text{up,basal}} = 0.012$  mM/ms: Rate constant for  $\text{Ca}^{2+}$  uptake by the  $\text{Ca}^{2+}$  pump in the network SR

113 (Please note that while we performed  $j_{\text{up}}$  computations in mM/ms, our results of parametric

114 sensitivity analysis in main text and Supplemental Tables are presented in mM/s).

115

**RyR function**

117  $k_{\text{oCa}} = 10$  mM<sup>-2</sup> · ms<sup>-1</sup>;  $k_{\text{om}} = 0.06$  ms<sup>-1</sup>;  $k_{\text{iCa}} = 0.5$  mM<sup>-1</sup> · ms<sup>-1</sup>;  $k_{\text{im}} = 0.005$  ms<sup>-1</sup>;  $EC_{50\_SR} = 0.45$

118 mM;  $k_{\text{s}} = 250 \cdot 10^3$  ms<sup>-1</sup>;  $MaxSR = 15$ ;  $MinSR = 1$ ;  $HSR = 2.5$ ;

119

**Ca<sup>2+</sup> and Mg<sup>2+</sup> buffering**

121  $k_{\text{bCM}} = 0.542$  ms<sup>-1</sup>:  $\text{Ca}^{2+}$  dissociation constant for calmodulin.

122  $k_{\text{bCQ}} = 0.445$  ms<sup>-1</sup>:  $\text{Ca}^{2+}$  dissociation constant for calsequestrin.

123  $k_{\text{bTC}} = 0.446$  ms<sup>-1</sup>:  $\text{Ca}^{2+}$  dissociation constant for the troponin- $\text{Ca}^{2+}$  site.

124  $k_{\text{bTMC}} = 0.00751$  ms<sup>-1</sup>:  $\text{Ca}^{2+}$  dissociation constant for the troponin- $\text{Mg}^{2+}$  site.

125  $k_{\text{bTMM}} = 0.751$  ms<sup>-1</sup>:  $\text{Mg}^{2+}$  dissociation constant for the troponin- $\text{Mg}^{2+}$  site.

126  $k_{\text{fCM}} = 227.7$  mM<sup>-1</sup> · ms<sup>-1</sup>:  $\text{Ca}^{2+}$  association constant for calmodulin.

127  $k_{\text{fCQ}} = 0.534$  mM<sup>-1</sup> · ms<sup>-1</sup>:  $\text{Ca}^{2+}$  association constant for calsequestrin.

128  $k_{\text{fTC}} = 88.8$  mM/ms:  $\text{Ca}^{2+}$  association constant for troponin.

129  $k_{\text{fTMC}} = 227.7$  mM/ms:  $\text{Ca}^{2+}$  association constant for the troponin- $\text{Mg}^{2+}$  site.

130  $k_{\text{fTMM}} = 2.277$  mM/ms:  $\text{Mg}^{2+}$  association constant for the troponin- $\text{Mg}^{2+}$  site.

131  $TC_{\text{tot}} = 0.031$  mM: Total concentration of the troponin- $\text{Ca}^{2+}$  site.

132  $TMC_{\text{tot}} = 0.062$  mM: Total concentration of the troponin- $\text{Mg}^{2+}$  site.

133  $CQ_{\text{tot}} = 10$  mM: Total calsequestrin concentration.

134  $CM_{\text{tot}} = 0.045$  mM: Total calmodulin concentration.

135

136

## FORMULATIONS: ELECTROPHYSIOLOGY

137  
138  
139  
140  
141  
142  
143  
144  
145  
146  
147  
148  
149  
150  
151  
152  
153  
154  
155  
156  
157  
158  
159  
160  
161  
162  
163  
164  
165  
166  
167  
168  
169  
170  
171  
172  
173  
174  
175  
176  
177  
178  
179  
180

**Membrane potential,  $V_m$  (variable  $y_{15}$ , see Table S1 for all variables and their initial values)**

$$dV_m/dt = - (I_{CaL} + I_{CaT} + I_f + I_{st} + I_{Kr} + I_{Ks} + I_{to} + I_{sus} + I_{NaK} + I_{NCX} + I_{bCa} + I_{bNa} + I_{KACH}) / C_m$$

**Gating variables ( $y_{16} - y_{30}$ ) and their differential equations**

$$dy_i/dt = (y_{i,\infty} - y) / \tau_{yi}$$

$$(y_i = d_L, f_L, f_{Ca}, d_T, f_T, p_{aF}, p_{aS}, p_i, n, q, r, y, q_a, q_i, a)$$

$\tau_{yi}$ : Time constant for a gating variable  $y_i$ .

$\alpha_{yi}$  and  $\beta_{yi}$ : Opening and closing rates for channel gating.

$y_{i,\infty}$ : Steady-state curve for a gating variable  $y_i$ .

### Ion currents

**L-type  $Ca^{2+}$  current ( $I_{CaL}$ )**, based on formulations of Kurata et al. (4) that include  $Ca^{2+}$  dependent  $I_{CaL}$  inactivation. See also Table S2 for comparison of steady-state activation parameters with those in other SANC models. The fractional block ( $b_{CaL}$ ) of  $I_{CaL}$  by ChR stimulation was adopted from (15).

$$I_{CaL} = C_m \cdot g_{CaL,max} \cdot (V_m - E_{CaL}) \cdot d_L \cdot f_L \cdot f_{Ca}$$

$$d_{L,\infty} = 1 / \{1 + \exp[-(V_m - V_{1/2,d}) / K_d]\}$$

$$f_{L,\infty} = 1 / \{1 + \exp[(V_m - V_{1/2,f}) / K_f]\}$$

$$\alpha_{dL} = -0.02839 \cdot (V_m + 35) / \{\exp[-(V_m + 35) / 2.5] - 1\} - 0.0849 \cdot V_m / [\exp(-V_m / 4.8) - 1]$$

$$\beta_{dL} = 0.01143 \cdot (V_m - 5) / \{\exp[(V_m - 5) / 2.5] - 1\}$$

$$\tau_{dL} = 1 / (\alpha_{dL} + \beta_{dL})$$

$$\tau_{fL} = 257.1 \cdot \exp\{-[(V_m + 32.5) / 13.9]^2\} + 44.3$$

$$f_{Ca,\infty} = K_{mfCa} / (K_{mfCa} + C_{a,sub})$$

$$\tau_{fCa} = f_{Ca,\infty} / \alpha_{fCa}$$

$$g_{CaL,max} = C_m \cdot g_{CaL,basal} \cdot (1 - b_{CaL})$$

$$b_{CaL} = b_{CaL,max} \cdot [ACh] / (K_{0.5,CaL} + [ACh])$$

**T-type  $Ca^{2+}$  current ( $I_{CaT}$ )**, based on formulations suggested by Demir et al., (2) and modified by Kurata et al. (4).

$$I_{CaT} = C_m \cdot g_{CaT,max} \cdot (V_m - E_{CaT}) \cdot d_T \cdot f_T$$

$$d_{T,\infty} = 1 / \{1 + \exp[-(V_m + 26.3) / 6.0]\}$$

$$f_{T,\infty} = 1 / \{1 + \exp[(V_m + 61.7) / 5.6]\}$$

$$\tau_{dT} = 1 / \{1.068 \cdot \exp[(V_m + 26.3) / 30] + 1.068 \cdot \exp[-(V_m + 26.3) / 30]\}$$

$$\tau_{fT} = 1 / \{0.0153 \cdot \exp[-(V_m + 61.7) / 83.3] + 0.015 \cdot \exp[(V_m + 61.7) / 15.38]\}$$

181 **Rapidly activating delayed rectifier K<sup>+</sup> current ( $I_{Kr}$ )**, based on formulations suggested by  
 182 Zhang et al. (14) and modified by Kurata et al. (4).

183

$$184 \quad I_{Kr} = C_m \cdot g_{Kr,max} \cdot (V_m - E_K) \cdot (0.6 \cdot p_{aF} + 0.4 \cdot p_{aS}) \cdot p_i$$

$$185 \quad p_{a,\infty} = 1 / \{1 + \exp[-(V_m + 23.2)/10.6]\}$$

$$186 \quad p_{i,\infty} = 1 / \{1 + \exp[(V_m + 28.6)/17.1]\}$$

$$187 \quad \tau_{paF} = 0.84655354 / [0.0372 \cdot \exp(V_m/15.9) + 0.00096 \cdot \exp(-V_m/22.5)]$$

$$188 \quad \tau_{paS} = 0.84655354 / [0.0042 \cdot \exp(V_m/17.0) + 0.00015 \cdot \exp(-V_m/21.6)]$$

$$189 \quad \tau_{pi} = 1 / [0.1 \cdot \exp(-V_m/54.645) + 0.656 \cdot \exp(V_m/106.157)]$$

190

191 **Slowly activating delayed rectifier K<sup>+</sup> current ( $I_{Ks}$ )**, based on formulations suggested by  
 192 Zhang et al. (14).

$$193 \quad I_{Ks} = C_m \cdot g_{Ks,max} \cdot (V_m - E_{Ks}) \cdot n^2$$

$$194 \quad \alpha_n = 0.014 / \{1 + \exp[-(V_m - 40)/9]\}$$

$$195 \quad \beta_n = 0.001 \cdot \exp(-V_m/45)$$

$$196 \quad n_\infty = \alpha_n / (\alpha_n + \beta_n)$$

$$197 \quad \tau_n = 1 / (\alpha_n + \beta_n)$$

198

199 **4-aminopyridine-sensitive currents ( $I_{4AP} = I_{to} + I_{sus}$ )**, based on formulations suggested by  
 200 Zhang et al. (14).

$$201 \quad I_{to} = C_m \cdot g_{to,max} \cdot (V_m - E_K) \cdot q \cdot r$$

$$202 \quad I_{sus} = C_m \cdot g_{sus,max} \cdot (V_m - E_K) \cdot r$$

$$203 \quad q_\infty = 1 / \{1 + \exp[(V_m + 49)/13]\}$$

$$204 \quad r_\infty = 1 / \{1 + \exp[-(V_m - 19.3)/15]\}$$

$$205 \quad \tau_q = 39.102 / \{0.57 \cdot \exp[-0.08 \cdot (V_m + 44)] + 0.065 \cdot \exp[0.1 \cdot (V_m + 45.93)]\} + 6.06$$

$$206 \quad \tau_r = 14.40516 / \{1.037 \cdot \exp[0.09 \cdot (V_m + 30.61)] + 0.369 \cdot \exp[-0.12 \cdot (V_m + 23.84)]\} + 2.75352$$

207

208

209 **Hyperpolarization-activated, “funny” current ( $I_f$ )**, based on formulations of Wilders et al.  
 210 (13) and Kurata et al. (4). The shift  $s$  (in mV) of the  $I_f$  activation curve by ChR stimulation was  
 211 adopted from (15).

$$212 \quad I_f = I_{fNa} + I_{fK}$$

$$213 \quad y_\infty = 1 / \{1 + \exp[(V_m - V_{If,1/2}) / 13.5]\}$$

$$214 \quad \tau_y = 0.7166529 / \{\exp[-(V_m + 386.9)/45.302] + \exp[(V_m - 73.08)/19.231]\}$$

$$215 \quad I_{fNa} = C_m \cdot 0.3833 \cdot g_{If,max} \cdot (V_m - E_{Na}) \cdot y^2$$

$$216 \quad I_{fK} = C_m \cdot 0.6167 \cdot g_{If,max} \cdot (V_m - E_K) \cdot y^2$$

$$217 \quad V_{If,1/2} = V_{If,1/2,basal} + s$$

$$218 \quad s = s_{max} [ACH]^{n_f} / (K_{0.5,f}^{n_f} + [ACH]^{n_f})$$

219

220 **Sustained inward current ( $I_{st}$ )**, based on formulations of Shinigawa et al. (10) which were  
 221 adopted for rabbit SANC by Kurata et al. (4).

$$222 \quad I_{st} = C_m \cdot g_{st,max} \cdot (V_m - E_{st}) \cdot q_a \cdot q_i$$

$$223 \quad q_{a,\infty} = 1 / \{1 + \exp[-(V_m + 57)/5]\}$$

$$224 \quad \alpha_{qa} = 1 / \{0.15 \cdot \exp(-V_m/11) + 0.2 \cdot \exp(-V_m/700)\}$$

$$225 \quad \beta_{qa} = 1 / \{16 \cdot \exp(V_m/8) + 15 \cdot \exp(V_m/50)\}$$

$$\begin{aligned} \tau_{qa} &= 1/(\alpha_{qa} + \beta_{qa}) \\ \alpha_{qi} &= 1/\{3100 \cdot \exp(V_m/13) + 700 \cdot \exp(V_m/70)\} \\ \beta_{qi} &= 1/\{95 \cdot \exp(-V_m/10) + 50 \cdot \exp(-V_m/700)\} + 0.000229/[1 + \exp(-V_m/5)] \\ \tau_{qi} &= 6.65/(\alpha_{qi} + \beta_{qi}) \\ q_{i,\infty} &= \alpha_{qi} / (\alpha_{qi} + \beta_{qi}) \end{aligned}$$

**Na<sup>+</sup>-dependent background current ( $I_{bNa}$ )**

$$I_{b,Na} = C_m \cdot g_{bNa} \cdot (V_m - E_{Na})$$

**Na<sup>+</sup>-K<sup>+</sup> pump current ( $I_{NaK}$ )**, based on formulations on Kurata et al. (4), which were in turn based on the experimental work of Sakai et al. (8) for rabbit SANC.

$$I_{NaK} = C_m \cdot I_{NaK,max} \cdot \{1 + (K_{mKp}/K_o)^{1.2}\}^{-1} \cdot \{1 + (K_{mNap}/Na_i)^{1.3}\}^{-1} \cdot \{1 + \exp[-(V_m - E_{Na} + 120)/30]\}^{-1}$$

**Ca<sup>2+</sup>- background current ( $I_{bCa}$ )**

$$I_{bCa} = C_m \cdot g_{bCa} \cdot (V_m - E_{CaL})$$

**Na<sup>+</sup>-Ca<sup>2+</sup> exchanger current ( $I_{NCX}$ )**, based on original formulations from Dokos et al. (3).

$$\begin{aligned} I_{NCX} &= C_m \cdot k_{NCX} \cdot (k_{21} \cdot x_2 - k_{12} \cdot x_1) / (x_1 + x_2 + x_3 + x_4) \\ d_o &= 1 + (Ca_o/K_{co}) \cdot \{1 + \exp(Q_{co} \cdot V_m/E_T)\} + (Na_o/K_{1no}) \cdot \{1 + (Na_o/K_{2no}) \cdot (1 + Na_o/K_{3no})\} \\ k_{43} &= Na_i / (K_{3ni} + Na_i) \\ k_{41} &= \exp[-Q_n \cdot V_m / (2E_T)] \\ k_{34} &= Na_o / (K_{3no} + Na_o) \\ k_{21} &= (Ca_o/K_{co}) \cdot \exp(Q_{co} \cdot V_m/E_T) / d_o \\ k_{23} &= (Na_o/K_{1no}) \cdot (Na_o/K_{2no}) \cdot (1 + Na_o/K_{3no}) \cdot \exp[-Q_n \cdot V_m / (2E_T)] / d_o \\ k_{32} &= \exp[Q_n \cdot V_m / (2E_T)] \\ x_1 &= k_{34} \cdot k_{41} \cdot (k_{23} + k_{21}) + k_{21} \cdot k_{32} \cdot (k_{43} + k_{41}) \\ d_i &= 1 + (Ca_{sub}/K_{ci}) \cdot \{1 + \exp(-Q_{ci} \cdot V_m/E_T) + Na_i/K_{cni}\} + (Na_i/K_{1ni}) \cdot \{1 + (Na_i/K_{2ni}) \cdot (1 + Na_i/K_{3ni})\} \\ k_{12} &= (Ca_{sub}/K_{ci}) \cdot \exp(-Q_{ci} \cdot V_m/E_T) / d_i \\ k_{14} &= (Na_i/K_{1ni}) \cdot (Na_i/K_{2ni}) \cdot (1 + Na_i/K_{3ni}) \cdot \exp[Q_n \cdot V_m / (2E_T)] / d_i \\ x_2 &= k_{43} \cdot k_{32} \cdot (k_{14} + k_{12}) + k_{41} \cdot k_{12} \cdot k_{34} + k_{32} \\ x_3 &= k_{43} \cdot k_{14} \cdot (k_{23} + k_{21}) + k_{12} \cdot k_{23} \cdot (k_{43} + k_{41}) \\ x_4 &= k_{34} \cdot k_{23} \cdot (k_{14} + k_{12}) + k_{21} \cdot k_{14} \cdot (k_{34} + k_{32}) \end{aligned}$$

**Acetylcholine-activated K<sup>+</sup> current ( $I_{KACh}$ )**, adopted from (1) (Note  $I_{KACh} = 0$  when  $[ACh] = 0$ )

$$\begin{aligned} I_{KACh} &= a \cdot g_{KACh,max} \cdot (V_m - E_K) \\ beta &= 0.001 \cdot 12.32 / (1 + 0.0042/[ACh]) \text{ (per ms)} \\ alfa &= 0.001 \cdot 17 \cdot \exp(0.0133 \cdot (V_m + 40)) \text{ (per ms)} \\ a_\infty &= beta / (alfa + beta) \\ \tau_a &= 1 / (alfa + beta) \text{ (in ms)} \end{aligned}$$

273  
274  
275  
276  
277  
278  
279  
280  
281  
282  
283  
284  
285  
286  
287  
288  
289  
290  
291  
292  
293  
294  
295  
296  
297  
298  
299  
300  
301  
302  
303  
304  
305  
306  
307  
308  
309  
310  
311  
312  
313  
314  
315  
316

## FORMULATIONS: Ca<sup>2+</sup> CYCLING

**Ca<sup>2+</sup> release flux ( $j_{\text{SRCarel}}$ ) from SR via RyRs**, based on original formulations of Stern et al. (11) and modified by Shannon et al. (9)

$$j_{\text{SRCarel}} = k_s \cdot O \cdot (Ca_{\text{jSR}} - Ca_{\text{sub}})$$

$$k_{\text{CaSR}} = \text{MaxSR} - (\text{MaxSR} - \text{MinSR}) / (1 + (EC_{50\_SR} / Ca_{\text{jSR}})^{\text{HSR}})$$

$$k_{\text{oSRCa}} = k_{\text{oCa}} / k_{\text{CaSR}}$$

$$k_{\text{iSRCa}} = k_{\text{iCa}} \cdot k_{\text{CaSR}}$$

$$dR/dt = (k_{\text{im}} \cdot RI - k_{\text{iSRCa}} \cdot Ca_{\text{sub}} \cdot R) - (k_{\text{oSRCa}} \cdot Ca_{\text{sub}}^2 \cdot R - k_{\text{om}} \cdot O)$$

$$dO/dt = (k_{\text{oSRCa}} \cdot Ca_{\text{sub}}^2 \cdot R - k_{\text{om}} \cdot O) - (k_{\text{iSRCa}} \cdot Ca_{\text{sub}} \cdot O - k_{\text{im}} \cdot I)$$

$$dI/dt = (k_{\text{iSRCa}} \cdot Ca_{\text{sub}} \cdot O - k_{\text{im}} \cdot I) - (k_{\text{om}} \cdot I - k_{\text{oSRCa}} \cdot Ca_{\text{sub}}^2 \cdot RI)$$

$$dRI/dt = (k_{\text{om}} \cdot I - k_{\text{oSRCa}} \cdot Ca_{\text{sub}}^2 \cdot RI) - (k_{\text{im}} \cdot RI - k_{\text{iSRCa}} \cdot Ca_{\text{sub}} \cdot R)$$

### Intracellular Ca<sup>2+</sup> fluxes

**Ca<sup>2+</sup> diffusion flux ( $j_{\text{Ca\_dif}}$ )** from submembrane space to myoplasm:

$$j_{\text{Ca\_dif}} = (Ca_{\text{sub}} - Ca_{\text{i}}) / \tau_{\text{difCa}}$$

**The rate of Ca<sup>2+</sup> uptake (pumping) ( $j_{\text{up}}$ )** by the SR, based on formulations of SR Ca<sup>2+</sup> pump function suggested by Luo and Rudy (5). The fractional block ( $b_{\text{up}}$ ) of  $P_{\text{up}}$  by ChR stimulation was described similar to that of  $I_{\text{CaL}}$  (see above), but  $b_{\text{up,max}}$  was fitted to experimental curve of phospholamban dephosphorylation (6) (main text Fig. 4A).

$$j_{\text{up}} = P_{\text{up}} / (1 + K_{\text{up}} / Ca_{\text{i}})$$

$$P_{\text{up}} = P_{\text{up,basal}} \cdot (1 - b_{\text{up}})$$

$$b_{\text{up}} = b_{\text{up,max}} \cdot [\text{ACh}] / (K_{0.5,\text{up}} + [\text{ACh}])$$

**Ca<sup>2+</sup> flux between (network and junctional) SR compartments ( $j_{\text{tr}}$ ):**

$$j_{\text{tr}} = (Ca_{\text{nSR}} - Ca_{\text{jSR}}) / \tau_{\text{tr}}$$

### Ca<sup>2+</sup> buffering

$$df_{\text{TC}}/dt = k_{\text{fTC}} \cdot Ca_{\text{i}} \cdot (1 - f_{\text{TC}}) - k_{\text{bTC}} \cdot f_{\text{TC}}$$

$$df_{\text{TMC}}/dt = k_{\text{fTMC}} \cdot Ca_{\text{i}} \cdot (1 - f_{\text{TMC}} - f_{\text{TMM}}) - k_{\text{bTMC}} \cdot f_{\text{TMC}}$$

$$df_{\text{TMM}}/dt = k_{\text{fTMM}} \cdot Mg_{\text{i}} \cdot (1 - f_{\text{TMC}} - f_{\text{TMM}}) - k_{\text{bTMM}} \cdot f_{\text{TMM}}$$

$$df_{\text{CMi}}/dt = k_{\text{fCMi}} \cdot Ca_{\text{i}} \cdot (1 - f_{\text{CMi}}) - k_{\text{bCMi}} \cdot f_{\text{CMi}}$$

$$df_{\text{CMs}}/dt = k_{\text{fCMs}} \cdot Ca_{\text{sub}} \cdot (1 - f_{\text{CMs}}) - k_{\text{bCMs}} \cdot f_{\text{CMs}}$$

$$df_{\text{CQ}}/dt = k_{\text{fCQ}} \cdot Ca_{\text{jSR}} \cdot (1 - f_{\text{CQ}}) - k_{\text{bCQ}} \cdot f_{\text{CQ}}$$

### Dynamics of Ca<sup>2+</sup> concentrations in cell compartments

$$dCa_{\text{i}}/dt = (j_{\text{Ca\_dif}} \cdot V_{\text{sub}} - j_{\text{up}} \cdot V_{\text{nSR}}) / V_{\text{i}} - (CM_{\text{tot}} \cdot df_{\text{CMi}}/dt + TC_{\text{tot}} \cdot df_{\text{TC}}/dt + TMC_{\text{tot}} \cdot df_{\text{TMC}}/dt)$$

$$dCa_{\text{sub}}/dt = j_{\text{SRCarel}} \cdot V_{\text{jSR}} / V_{\text{sub}} - (I_{\text{CaL}} + I_{\text{CaT}} + I_{\text{bCa-2}} \cdot I_{\text{NCX}}) / (2 \cdot F \cdot V_{\text{sub}}) - (j_{\text{Ca\_dif}} + CM_{\text{tot}} \cdot df_{\text{CMs}}/dt)$$

$$dCa_{\text{jSR}}/dt = j_{\text{tr}} - j_{\text{SRCarel}} - CQ_{\text{tot}} \cdot df_{\text{CQ}}/dt$$

$$dCa_{\text{nSR}}/dt = j_{\text{up}} - j_{\text{tr}} \cdot V_{\text{jSR}} / V_{\text{nSR}}$$

317 **Online Supplement Table S1.** Model variables: description and initial values. Our SANC model  
 318 is described by a system of 30 first order differential equations (variables  $y_1 - y_{30}$ ). All initial  
 319 values (except that for  $y_{30}$ ) were taken from our prior study (7).  
 320

| #                                     | Variable   | Description                                                                                | Initial value       |
|---------------------------------------|------------|--------------------------------------------------------------------------------------------|---------------------|
| <b><i>Ca<sup>2+</sup> cycling</i></b> |            |                                                                                            |                     |
| $y_1$                                 | $Ca_i$     | [Ca <sup>2+</sup> ] in myoplasm, mM                                                        | 0.0001              |
| $y_2$                                 | $Ca_{sub}$ | [Ca <sup>2+</sup> ] in submembrane space, mM                                               | 0.000223            |
| $y_3$                                 | $Ca_{jSR}$ | [Ca <sup>2+</sup> ] in the junctional SR (jSR), mM                                         | 0.029               |
| $y_4$                                 | $Ca_{nSR}$ | [Ca <sup>2+</sup> ] in the network SR (nSR), mM                                            | 1.35                |
| $y_5$                                 | $f_{TC}$   | Fractional occupancy of the troponin-Ca <sup>2+</sup> site by Ca <sup>2+</sup> in myoplasm | 0.02                |
| $y_6$                                 | $f_{TMC}$  | Fractional occupancy of the troponin-Mg <sup>2+</sup> site by Ca <sup>2+</sup> in myoplasm | 0.22                |
| $y_7$                                 | $f_{TMM}$  | Fractional occupancy of the troponin-Mg <sup>2+</sup> site by Mg <sup>2+</sup> in myoplasm | 0.69                |
| $y_8$                                 | $f_{CMi}$  | Fractional occupancy of calmodulin by Ca <sup>2+</sup> in myoplasm                         | 0.042               |
| $y_9$                                 | $f_{CMs}$  | Fractional occupancy of calmodulin by Ca <sup>2+</sup> in submembrane space                | 0.089               |
| $y_{10}$                              | $f_{CQ}$   | Fractional occupancy of calsequestrin by Ca <sup>2+</sup> in junctional SR                 | 0.032               |
| $y_{11}$                              | $R$        | RyR reactivated (closed) state                                                             | 0.7499955           |
| $y_{12}$                              | $O$        | RyR open state                                                                             | $3.4 \cdot 10^{-6}$ |
| $y_{13}$                              | $I$        | RyR inactivated state                                                                      | $1.1 \cdot 10^{-6}$ |
| $y_{14}$                              | $RI$       | RyR RI state                                                                               | 0.25                |
| <b><i>Electrophysiology</i></b>       |            |                                                                                            |                     |
| $y_{15}$                              | $V_m$      | Membrane potential, mV                                                                     | -65                 |
| $y_{16}$                              | $d_L$      | $I_{CaL}$ activation                                                                       | 0                   |
| $y_{17}$                              | $f_L$      | $I_{CaL}$ voltage-dependent inactivation                                                   | 1                   |
| $y_{18}$                              | $f_{Ca}$   | $I_{CaL}$ Ca <sup>2+</sup> dependent inactivation                                          | 1                   |
| $y_{19}$                              | $p_{aF}$   | $I_{Kr}$ fast activation                                                                   | 0                   |
| $y_{20}$                              | $p_{aS}$   | $I_{Kr}$ slow activation                                                                   | 0                   |
| $y_{21}$                              | $p_i$      | $I_{Kr}$ inactivation                                                                      | 1                   |
| $y_{22}$                              | $n$        | $I_{Ks}$ activation                                                                        | 0                   |
| $y_{23}$                              | $y$        | $I_f$ activation                                                                           | 1                   |
| $y_{24}$                              | $d_T$      | $I_{CaT}$ activation                                                                       | 0                   |
| $y_{25}$                              | $f_T$      | $I_{CaT}$ inactivation                                                                     | 1                   |
| $y_{26}$                              | $q$        | $I_{to}$ inactivation                                                                      | 1                   |
| $y_{27}$                              | $r$        | $I_{to}$ and $I_{sus}$ activation                                                          | 0                   |
| $y_{28}$                              | $q_a$      | $I_{st}$ activation                                                                        | 0                   |
| $y_{29}$                              | $q_i$      | $I_{st}$ inactivation                                                                      | 1                   |
| $y_{30}$                              | $a$        | $I_{KACh}$ activation                                                                      | 1                   |

321



322 **Online Supplement Table S2.**

323 Parameters of steady-state activation and inactivation for  $I_{CaL}$  in the present model compared to  
 324 previous rabbit SANC models (see main text Methods for details). \* Steady state inactivation  
 325 parameters were set in our model to the respective values measured in our laboratory in an  
 326 experimental study of isolated rabbit SANC by Vinogradova et al. (12).  
 327

| Model                | Steady-state activation curve,<br>$d_{L,\infty}$ |                            | Steady-state inactivation curve,<br>$f_{L,\infty}$ |                            |
|----------------------|--------------------------------------------------|----------------------------|----------------------------------------------------|----------------------------|
|                      | Midpoint,<br>$V_{\frac{1}{2},d}$ (mV)            | Slope factor<br>$K_d$ (mV) | Midpoint,<br>$V_{\frac{1}{2},f}$ (mV)              | Slope factor<br>$K_f$ (mV) |
| Wilders et al. (13)  | -6.6                                             | 6.6                        | -25                                                | 6                          |
| Demir et al. (2)     | -14.1                                            | 6                          | -25                                                | 5                          |
| Dokos et al. (3)     | -6.6                                             | 6.6                        | -25                                                | 6                          |
| Zhang et al. (14)    | -23.1                                            | 6                          | -45                                                | 5                          |
| Kurata et al. (4)    | -14.1                                            | 6                          | -30                                                | 5                          |
| <b>Present model</b> | <b>-13.5</b>                                     | <b>6</b>                   | <b>-35*</b>                                        | <b>7.3*</b>                |

328

329

330

331 **Online Supplement Table S3.**

332 **Parameter values and result summary of simulations of  $\beta$ -AR stimulation.** In addition to the  
 333 primary set of model parameters (described above), the robustness of our findings was also  
 334 tested in two additional model sets (See “Parameter set” column), in which both maximum  
 335 conductances  $g_{CaL,max}$  and  $g_{If,max}$  were increased (model set “More  $I_f$  &  $I_{CaL}$ ”) or decreased (model  
 336 set “Less  $I_f$  &  $I_{CaL}$ ”) by 25%. While the shift of  $V_{If,1/2}$  and relative increases in  $g_{CaL,max}$  and  $g_{Kr,max}$   
 337 were set in accordance with previously documented experimental results in rabbits SANC (see  
 338 main text Methods for details), the values for the maximum  $Ca^{2+}$  pumping rate of the SR ( $P_{up}$ )  
 339 were found numerically based on parametric sensitivity analyses as solutions to match  
 340 experimentally documented result of a 25.8% AP firing rate increase (main text figure 2A, black  
 341 circle, squire, and triangle, respectively).  
 342  
 343

| Parameter set                       | Parameter     | Units | Basal state | $\beta$ -AR stimulation | Effect on beating rate: M clock, only | Effect on beating rate: All mechanisms |
|-------------------------------------|---------------|-------|-------------|-------------------------|---------------------------------------|----------------------------------------|
| Primary model set                   | $P_{up}$      | mM/s  | 12          | 24                      | 3.070 Hz to 3.166 Hz (3.15% increase) | 3.070 Hz to 3.862 Hz (25.80% increase) |
|                                     | $g_{CaL,max}$ | nS/pF | 0.58        | 1.015                   |                                       |                                        |
|                                     | $V_{If,1/2}$  | mV    | -64         | -56.2                   |                                       |                                        |
|                                     | $g_{Kr,max}$  | nS/pF | 0.08113973  | 0.1217096               |                                       |                                        |
|                                     | $g_{If,max}$  | nS/pF | 0.15        |                         |                                       |                                        |
| Model set “Less $I_f$ & $I_{CaL}$ ” | $P_{up}$      | mM/s  | 12          | 20.6                    | 2.943 Hz to 3.089 Hz (4.97% increase) | 2.943 Hz to 3.702 Hz (25.80% increase) |
|                                     | $g_{CaL,max}$ | nS/pF | 0.435       | 0.76125                 |                                       |                                        |
|                                     | $V_{If,1/2}$  | mV    | -64         | -56.2                   |                                       |                                        |
|                                     | $g_{Kr,max}$  | nS/pF | 0.08113973  | 0.1217096               |                                       |                                        |
|                                     | $g_{If,max}$  | nS/pF | 0.1125      |                         |                                       |                                        |
| Model set “More $I_f$ & $I_{CaL}$ ” | $P_{up}$      | mM/s  | 12          | 26.6                    | 3.116 Hz to 3.198 Hz (2.63% increase) | 3.116 Hz to 3.920 Hz (25.80% increase) |
|                                     | $g_{CaL,max}$ | nS/pF | 0.725       | 1.26875                 |                                       |                                        |
|                                     | $V_{If,1/2}$  | mV    | -64         | -56.2                   |                                       |                                        |
|                                     | $g_{Kr,max}$  | nS/pF | 0.08113973  | 0.1217096               |                                       |                                        |
|                                     | $g_{If,max}$  | nS/pF | 0.1875      |                         |                                       |                                        |

344

345

346

347 **Online Supplement Table S4.**  
 348 **Parameter values and result summary of simulations of ChR stimulation ([ACh]=100 nM).**  
 349 In addition to the primary set of model parameters (described above), the robustness of our  
 350 findings was also tested in two additional model sets (See “Parameter set” column), in which  
 351 both maximum conductances  $g_{CaL,max}$  and  $g_{If,max}$  were increased (model set “More  $I_f$  &  $I_{CaL}$ ”) or  
 352 decreased (model set “Less  $I_f$  &  $I_{CaL}$ ”) by 25%. All parameters, including  $P_{up}$ , were calculated  
 353 using above formulations for [ACh]=100 nM.  
 354  
 355

| Parameter set                          | Parameter     | Units     | Basal state | ChR stimulation           | Effect on beating rate<br>M clock              | Effect on beating rate<br>M+Ca clock           |
|----------------------------------------|---------------|-----------|-------------|---------------------------|------------------------------------------------|------------------------------------------------|
| Primary model set                      | $P_{up}$      | mM/s      | 12          | 7.578947                  | 3.070 Hz<br>to<br>2.615 Hz<br>(14.8% decrease) | 3.070 Hz<br>to<br>1.849 Hz<br>(40% decrease)   |
|                                        | $g_{CaL,max}$ | nS/pF     | 0.58        | 0.485368                  |                                                |                                                |
|                                        | $\beta$       | $ms^{-1}$ | 0           | $0.2865116 \cdot 10^{-3}$ |                                                |                                                |
|                                        | $V_{If,1/2}$  | mV        | -64         | -69.8089                  |                                                |                                                |
|                                        | $g_{If,max}$  | nS/pF     | 0.15        |                           |                                                |                                                |
| Model set<br>“Less $I_f$ & $I_{CaL}$ ” | $P_{up}$      | mM/s      | 12          | 7.578947                  | 2.943 Hz<br>to<br>halt                         | 2.943 Hz<br>to<br>halt                         |
|                                        | $g_{CaL,max}$ | nS/pF     | 0.435       | 0.364026                  |                                                |                                                |
|                                        | $\beta$       |           | 0           | $0.2865116 \cdot 10^{-3}$ |                                                |                                                |
|                                        | $V_{If,1/2}$  | mV        | -64         | -69.8089                  |                                                |                                                |
|                                        | $g_{If,max}$  | nS/pF     | 0.1125      |                           |                                                |                                                |
| Model set<br>“More $I_f$ & $I_{CaL}$ ” | $P_{up}$      | mM/s      | 12          | 7.578947                  | 3.116 Hz<br>to<br>2.832 Hz<br>(9.1% decrease)  | 3.116 Hz<br>to<br>2.354 Hz<br>(24.5% decrease) |
|                                        | $g_{CaL,max}$ | nS/pF     | 0.725       | 0.606711                  |                                                |                                                |
|                                        | $\beta$       |           | 0           | $0.2865116 \cdot 10^{-3}$ |                                                |                                                |
|                                        | $V_{If,1/2}$  | mV        | -64         | -69.8089                  |                                                |                                                |
|                                        | $g_{If,max}$  | nS/pF     | 0.1875      |                           |                                                |                                                |

356  
 357  
 358  
 359

360 **Online Supplement Fig.S1**

361 The predicted effects of GPCR agonists on the current voltage relationship for simulated peak  
 362  $I_{CaL}$ . The  $I_{CaL}$  traces were simulated by applying testing voltage pulses  $V_m$  from a holding  
 363 potential of -80 mV. A, B, and C show simulated traces for  $V_m$  from -60 mV to 40 mV with a 10  
 364 mV interval in the basal state (Control), in the presence of  $\beta$ -AR stimulation by isoproterenol  
 365 (ISO), and in the presence of ChR stimulation with 100 nM ACh. The values of  $V_m$  are shown by  
 366 labels at the respective current peaks. D: The current voltage relationships (5 mV voltage step)  
 367 for  $I_{CaL}$  peak. Inset illustrates presence of  $I_{CaL}$  current activation in the model within the voltage  
 368 range of the diastolic depolarization from -60 mV to -40 mV.

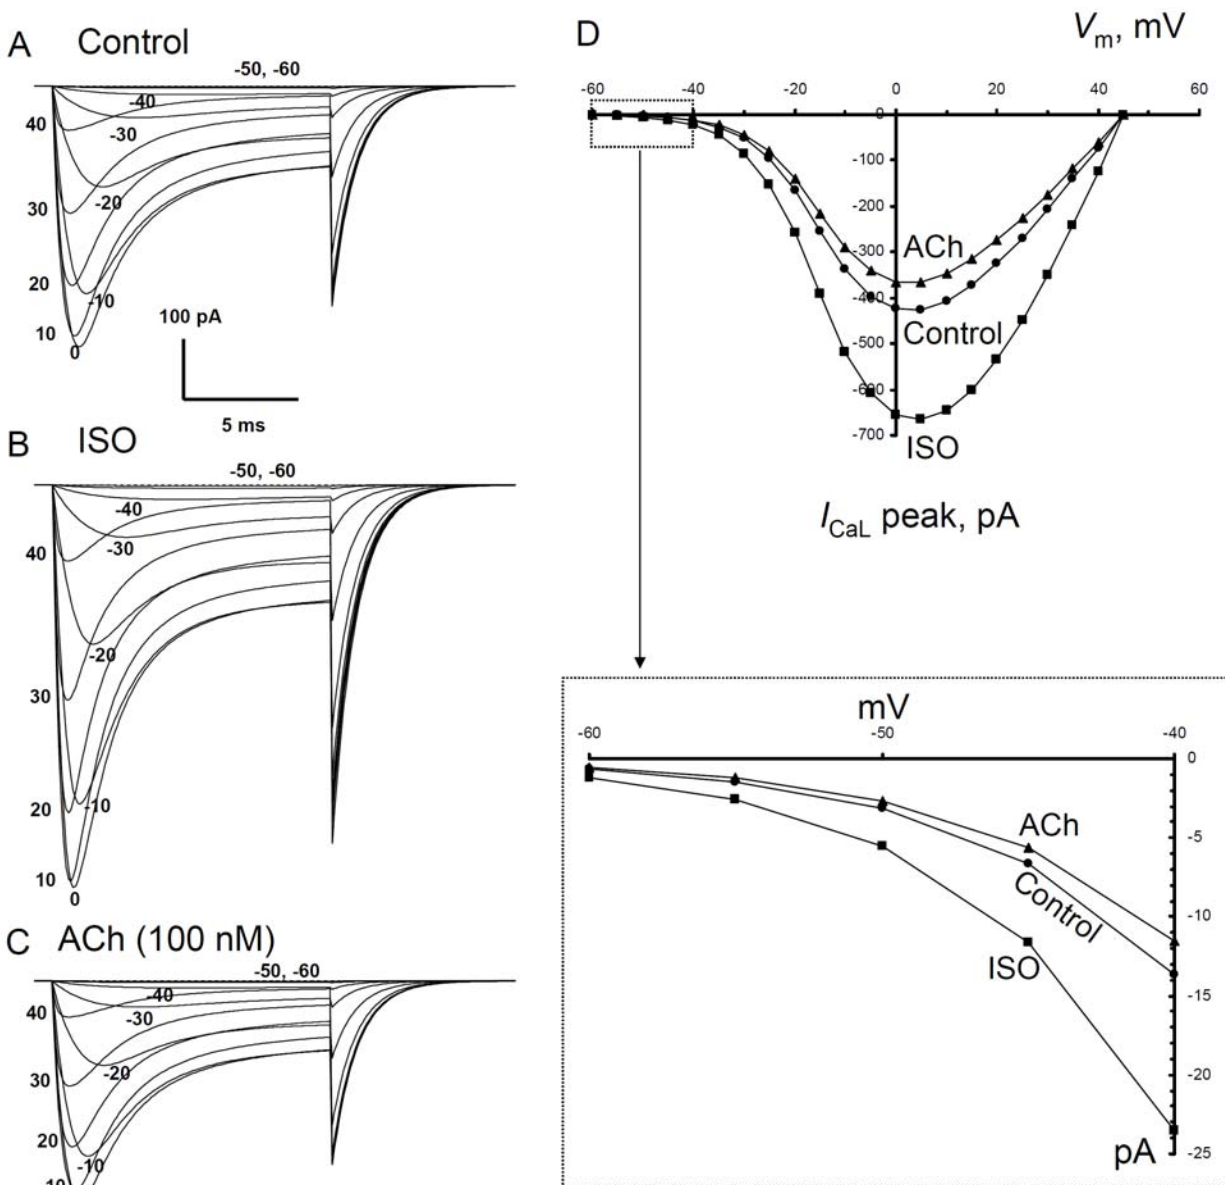

369  
 370

371 **Online Supplement Fig.S2**

372 The predicted effects of GPCR agonists on  $I_{CaL}$  dynamics during diastolic depolarization (DD)  
373 from -60 mV to -40 mV. A: simulated action potentials (APs) in the basal state (Control), in  
374 the presence of  $\beta$ -AR stimulation by isoproterenol (ISO), and in the presence of ChR stimulation  
375 with 100 nM ACh. APs were time shifted to overlap at -60 mV. DD fragments from -60 to -40  
376 mV are shown by solid black curves. B: simultaneously simulated dynamics of  $I_{CaL}$ . Activation  
377 of  $I_{CaL}$  accelerated and increased in case of ISO but decelerated and decreased in case of ACh.  
378 Cell electric capacitance is 32 pF.  
379

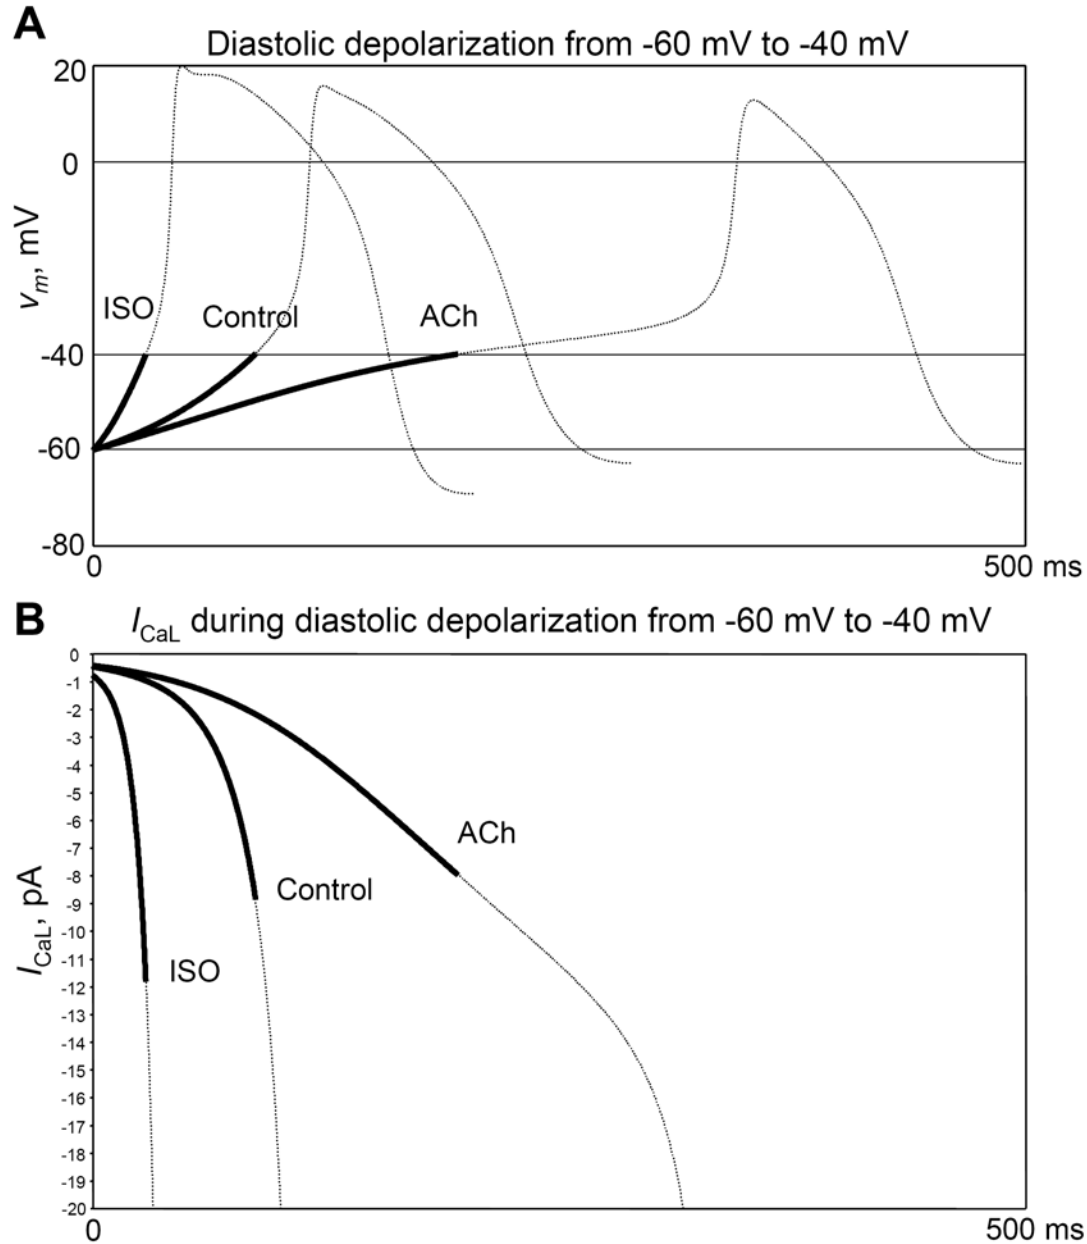

380

## 381 Supplemental references

382

383

384

385 1. **Demir SS, Clark JW, and Giles WR.** Parasympathetic modulation of sinoatrial node  
386 pacemaker activity in rabbit heart: a unifying model. *Am J Physiol* 276: H2221-2244, 1999.

387 2. **Demir SS, Clark JW, Murphey CR, and Giles WR.** A mathematical model of a rabbit  
388 sinoatrial node cell. *Am J Physiol* 266: C832-852, 1994.

389 3. **Dokos S, Celler B, and Lovell N.** Ion currents underlying sinoatrial node pacemaker  
390 activity: a new single cell mathematical model. *J Theor Biol* 181: 245-272, 1996.

391 4. **Kurata Y, Hisatome I, Imanishi S, and Shibamoto T.** Dynamical description of  
392 sinoatrial node pacemaking: improved mathematical model for primary pacemaker cell. *Am*  
393 *J Physiol* 283: H2074-2101, 2002.

394 5. **Luo CH and Rudy Y.** A dynamic model of the cardiac ventricular action potential. I.  
395 Simulations of ionic currents and concentration changes. *Circ Res* 74: 1071-1096, 1994.

396 6. **Lyashkov AE, Vinogradova TM, Zahanich I, Li Y, Younes A, Nuss HB, Spurgeon**  
397 **HA, Maltsev VA, and Lakatta EG.** Cholinergic receptor signaling modulates spontaneous  
398 firing of sinoatrial nodal cells via integrated effects on PKA-dependent  $Ca^{2+}$  cycling and  
399  $I_{KACH}$ . *Am J Physiol Heart Circ Physiol*: H949-H959, 2009.

400 7. **Maltsev VA and Lakatta EG.** Synergism of coupled subsarcolemmal  $Ca^{2+}$  clocks and  
401 sarcolemmal voltage clocks confers robust and flexible pacemaker function in a novel  
402 pacemaker cell model. *Am J Physiol Heart Circ Physiol* 296: H594-H615, 2009.

403 8. **Sakai R, Hagiwara N, Matsuda N, Kassanuki H, and Hosoda S.** Sodium--potassium  
404 pump current in rabbit sino-atrial node cells. *J Physiol* 490 ( Pt 1): 51-62, 1996.

405 9. **Shannon TR, Wang F, Puglisi J, Weber C, and Bers DM.** A mathematical treatment of  
406 integrated Ca dynamics within the ventricular myocyte. *Biophys J* 87: 3351-3371, 2004.

407 10. **Shinagawa Y, Satoh H, and Noma A.** The sustained inward current and inward rectifier  
408  $K^{+}$  current in pacemaker cells dissociated from rat sinoatrial node. *J Physiol* 523 Pt 3: 593-  
409 605, 2000.

410 11. **Stern MD, Song LS, Cheng H, Sham JS, Yang HT, Boheler KR, and Rios E.** Local  
411 control models of cardiac excitation-contraction coupling. A possible role for allosteric  
412 interactions between ryanodine receptors. *J Gen Physiol* 113: 469-489, 1999.

413 12. **Vinogradova TM, Zhou YY, Bogdanov KY, Yang D, Kuschel M, Cheng H, and Xiao**  
414 **RP.** Sinoatrial node pacemaker activity requires  $Ca^{2+}$ /calmodulin-dependent protein kinase  
415 II activation. *Circ Res* 87: 760-767, 2000.

416 13. **Wilders R, Jongsma HJ, and van Ginneken AC.** Pacemaker activity of the rabbit  
417 sinoatrial node. A comparison of mathematical models. *Biophys J* 60: 1202-1216, 1991.

418 14. **Zhang H, Holden AV, Kodama I, Honjo H, Lei M, Varghese T, and Boyett MR.**  
419 Mathematical models of action potentials in the periphery and center of the rabbit sinoatrial  
420 node. *Am J Physiol* 279: H397-421, 2000.

421 15. **Zhang H, Holden AV, Noble D, and Boyett MR.** Analysis of the chronotropic effect of  
422 acetylcholine on sinoatrial node cells. *J Cardiovasc Electrophysiol* 13: 465-474, 2002.

423

424
